# Supplementary material for: Loss of miR-1258 contributes to carcinogenesis and progression of liver cancer through targeting CDC28 protein kinase regulatory subunit 1B
Source: PubMed Central journal article supplement (PMC5190034; doi:10.18632/oncotarget.9728), 2016-05-30
Supplement: oncotarget-07-43419-s001.pdf [file oncotarget-07-43419-s001.pdf]

## Loss of miR-1258 contributes to carcinogenesis and progression of liver cancer through targeting CDC28 protein kinase regulatory subunit 1B

### Supplementary Materials

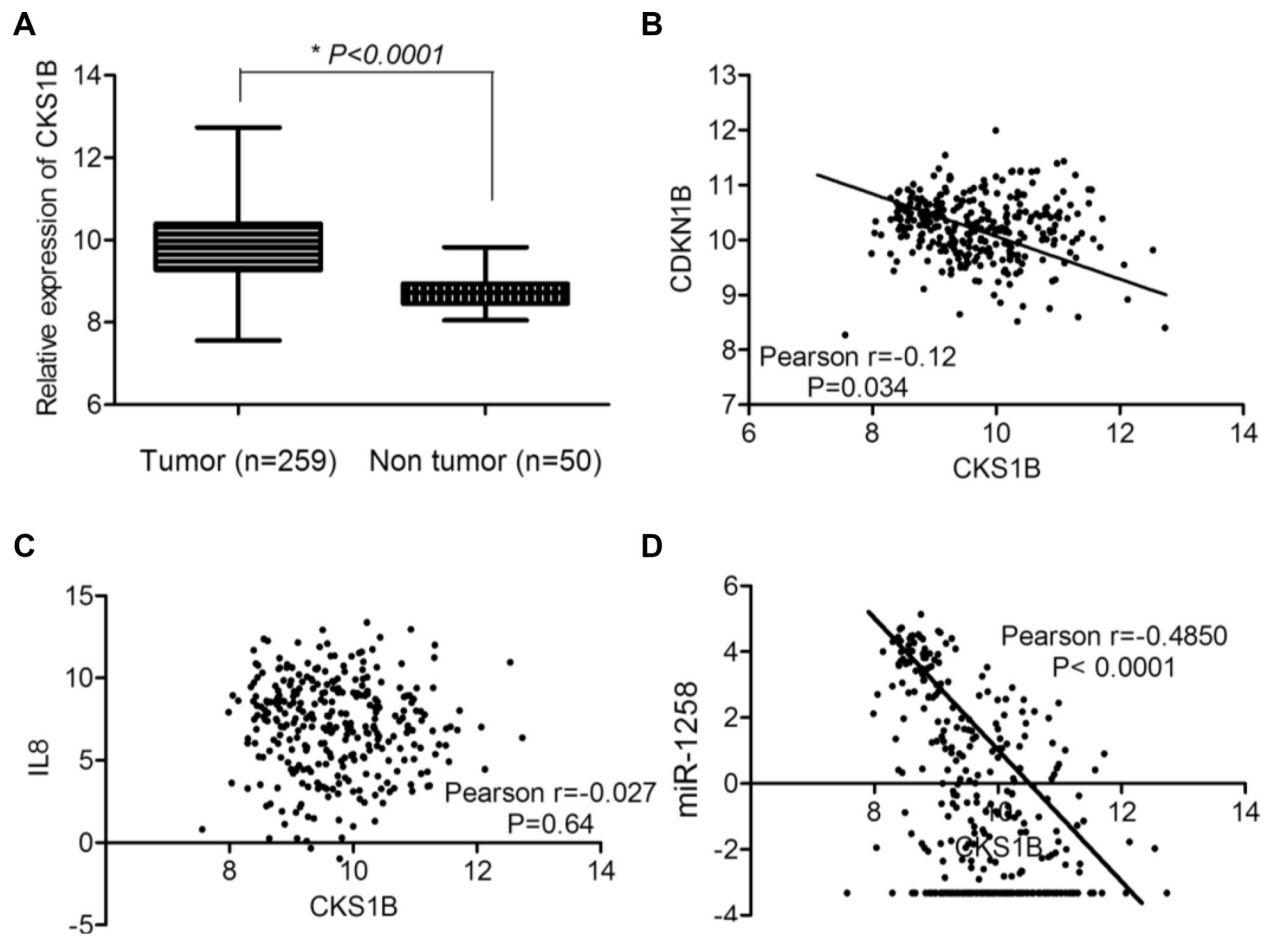

Supplementary Figure S1: The expression of CKS1B in TCGA dataset (A) and the expression correlation between CKS1B and p27 (CDKN1B) (B), or and IL8 (C) and miR-1258 in TCGA dataset (D).

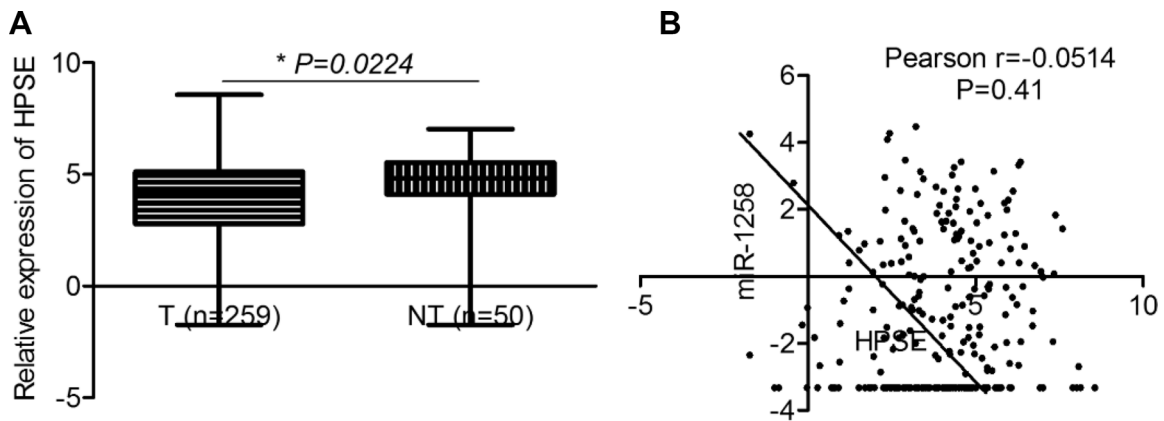

Supplementary Figure S2: The expression of HPSE in TCGA dataset (A) and the expression correlation between miR-1258 and HPSE in TCGA dataset (B).

Supplementary Table S1: The predict putative target genes of miR- 1258 by two different bioinformatics tools (target scan and miRDB)

| Target Rank | Target Score | miRNA Name   | Gene Symbol | Gene Description                                            | Representative transcript | Gene name                                                   | Number of 3P-seq tags supporting UTR + 5 | Link to sites in UTRs | Site counts | Cumulative weighted context++ score | Total context++ score |
|-------------|--------------|--------------|-------------|-------------------------------------------------------------|---------------------------|-------------------------------------------------------------|------------------------------------------|-----------------------|-------------|-------------------------------------|-----------------------|
| 125         | 60           | hsa-miR-1258 | ANXA3       | annexin A3                                                  | ENST00000264908.6         | annexin A3                                                  | 3305                                     | Sites in UTR          | 1           | -0.55                               | -0.55                 |
| 89          | 65           | hsa-miR-1258 | ATG12       | autophagy related 12                                        | ENST00000500945.2         | autophagy related 12                                        | 1822                                     | Sites in UTR          | 3           | -0.52                               | -1.25                 |
| 26          | 84           | hsa-miR-1258 | BNIP3L      | BCL2/adenovirus E1B 19kDa interacting protein 3-like        | ENST00000380629.2         | BCL2/adenovirus E1B 19kDa interacting protein 3-like        | 191                                      | Sites in UTR          | 2           | -0.56                               | -0.67                 |
| 140         | 58           | hsa-miR-1258 | C2orf66     | chromosome 2 open reading frame 66                          | ENST00000342506.2         | chromosome 2 open reading frame 66                          | 22                                       | Sites in UTR          | 1           | -0.41                               | -0.56                 |
| 118         | 62           | hsa-miR-1258 | C9orf47     | chromosome 9 open reading frame 47                          | ENST00000375851.2         | chromosome 9 open reading frame 47                          | 5                                        | Sites in UTR          | 2           | -0.56                               | -0.56                 |
| 32          | 82           | hsa-miR-1258 | CKS1B       | CDC28 protein kinase regulatory subunit 1B                  | ENST00000308987.5         | CDC28 protein kinase regulatory subunit 1B                  | 186                                      | Sites in UTR          | 1           | -0.65                               | -0.65                 |
| 29          | 82           | hsa-miR-1258 | CLIC4       | chloride intracellular channel 4                            | ENST00000374379.4         | chloride intracellular channel 4                            | 226                                      | Sites in UTR          | 1           | -0.48                               | -0.48                 |
| 13          | 90           | hsa-miR-1258 | CSDC2       | cold shock domain containing C2, RNA binding                | ENST00000306149.7         | cold shock domain containing C2, RNA binding                | 31                                       | Sites in UTR          | 2           | -0.61                               | -0.61                 |
| 9           | 93           | hsa-miR-1258 | EMX2        | empty spiracles homeobox 2                                  | ENST00000442245.4         | empty spiracles homeobox 2                                  | 54                                       | Sites in UTR          | 1           | -0.52                               | -0.57                 |
| 130         | 59           | hsa-miR-1258 | FAM206A     | family with sequence similarity 206, member A               | ENST00000322940.6         | family with sequence similarity 206, member A               | 266                                      | Sites in UTR          | 2           | -0.74                               | -0.74                 |
| 44          | 77           | hsa-miR-1258 | FAM84A      | family with sequence similarity 84, member A                | ENST00000295092.2         | family with sequence similarity 84, member A                | 69                                       | Sites in UTR          | 2           | -0.47                               | -0.74                 |
| 50          | 75           | hsa-miR-1258 | FAR2        | fatty acyl CoA reductase 2                                  | ENST00000536681.3         | fatty acyl CoA reductase 2                                  | 193                                      | Sites in UTR          | 1           | -0.55                               | -0.61                 |
| 105         | 63           | hsa-miR-1258 | FASLG       | Fas ligand (TNF superfamily, member 6)                      | ENST00000340030.3         | Fas ligand (TNF superfamily, member 6)                      | 5                                        | Sites in UTR          | 1           | -0.43                               | -0.43                 |
| 153         | 55           | hsa-miR-1258 | GAPT        | GRB2-binding adaptor protein, transmembrane                 | ENST00000396776.2         | GRB2-binding adaptor protein, transmembrane                 | 5                                        | Sites in UTR          | 2           | -0.58                               | -0.58                 |
| 73          | 69           | hsa-miR-1258 | GDPD1       | glycerophosphodiester phosphodiesterase domain containing 1 | ENST00000284116.4         | glycerophosphodiester phosphodiesterase domain containing 1 | 138                                      | Sites in UTR          | 1           | -0.46                               | -0.5                  |
| 28          | 83           | hsa-miR-1258 | GNG2        | guanine nucleotide binding protein (G protein), gamma 2     | ENST00000556752.1         | guanine nucleotide binding protein (G protein), gamma 2     | 199                                      | Sites in UTR          | 1           | -0.49                               | -0.55                 |

|     |    |              |          |                                                           |                   |                                                           |      |              |   |       |       |
|-----|----|--------------|----------|-----------------------------------------------------------|-------------------|-----------------------------------------------------------|------|--------------|---|-------|-------|
| 57  | 73 | hsa-miR-1258 | HDHC3    | HD domain containing 3                                    | ENST00000559898.1 | HD domain containing 3                                    | 1127 | Sites in UTR | 1 | -0.61 | -0.62 |
| 79  | 68 | hsa-miR-1258 | HERPUD2  | HERPUD family member 2                                    | ENST00000396081.1 | HERPUD family member 2                                    | 30   | Sites in UTR | 1 | -0.46 | -0.46 |
| 98  | 64 | hsa-miR-1258 | HOXD10   | homeobox D10                                              | ENST00000249501.4 | homeobox D10                                              | 182  | Sites in UTR | 1 | -0.44 | -0.44 |
| 41  | 79 | hsa-miR-1258 | LDHAL6A  | lactate dehydrogenase A-like 6A                           | ENST00000280706.2 | lactate dehydrogenase A-like 6A                           | 5    | Sites in UTR | 1 | -0.56 | -0.56 |
| 139 | 58 | hsa-miR-1258 | MAPRE3   | microtubule-associated protein, RP/EB family, member 3    | ENST00000233121.2 | microtubule-associated protein, RP/EB family, member 3    | 303  | Sites in UTR | 1 | -0.43 | -0.43 |
| 8   | 93 | hsa-miR-1258 | PCNP     | PEST proteolytic signal containing nuclear protein        | ENST00000296024.5 | PEST proteolytic signal containing nuclear protein        | 944  | Sites in UTR | 1 | -0.45 | -0.46 |
| 135 | 59 | hsa-miR-1258 | PDF      | peptide deformylase (mitochondrial)                       | ENST00000288022.1 | peptide deformylase (mitochondrial)                       | 190  | Sites in UTR | 1 | -0.5  | -0.5  |
| 68  | 70 | hsa-miR-1258 | PDYN     | prodynorphin                                              | ENST00000539905.1 | prodynorphin                                              | 5    | Sites in UTR | 1 | -0.56 | -0.56 |
| 42  | 78 | hsa-miR-1258 | PLCD4    | phospholipase C, delta 4                                  | ENST00000450993.2 | phospholipase C, delta 4                                  | 11   | Sites in UTR | 1 | -0.45 | -0.45 |
| 24  | 85 | hsa-miR-1258 | PMP22    | peripheral myelin protein 22                              | ENST00000395938.2 | peripheral myelin protein 22                              | 1152 | Sites in UTR | 1 | -0.5  | -0.5  |
| 12  | 91 | hsa-miR-1258 | PRLR     | prolactin receptor                                        | ENST00000342362.5 | prolactin receptor                                        | 95   | Sites in UTR | 4 | -0.58 | -0.75 |
| 10  | 92 | hsa-miR-1258 | RYBP     | RING1 and YY1 binding protein                             | ENST00000477973.2 | RING1 and YY1 binding protein                             | 342  | Sites in UTR | 2 | -0.45 | -0.47 |
| 56  | 73 | hsa-miR-1258 | SERPINB7 | serpin peptidase inhibitor, clade B (ovalbumin), member 7 | ENST00000398019.2 | serpin peptidase inhibitor, clade B (ovalbumin), member 7 | 37   | Sites in UTR | 1 | -0.51 | -0.51 |
| 3   | 97 | hsa-miR-1258 | SGMS1    | sphingomyelin synthase 1                                  | ENST00000361781.2 | sphingomyelin synthase 1                                  | 100  | Sites in UTR | 2 | -0.64 | -0.65 |
| 109 | 63 | hsa-miR-1258 | SMIM17   | small integral membrane protein 17                        | ENST00000598409.1 | small integral membrane protein 17                        | 5    | Sites in UTR | 1 | -0.63 | -0.63 |
| 103 | 63 | hsa-miR-1258 | THEMIS   | thymocyte selection associated                            | ENST00000368250.1 | thymocyte selection associated                            | 5    | Sites in UTR | 2 | -0.65 | -0.65 |
| 74  | 69 | hsa-miR-1258 | TMBIM1   | transmembrane BAX inhibitor motif containing 1            | ENST00000258412.3 | transmembrane BAX inhibitor motif containing 1            | 2201 | Sites in UTR | 2 | -0.71 | -0.71 |
| 76  | 69 | hsa-miR-1258 | TMEM68   | transmembrane protein 68                                  | ENST00000523073.1 | transmembrane protein 68                                  | 77   | Sites in UTR | 1 | -0.61 | -0.66 |
| 19  | 86 | hsa-miR-1258 | UBE2H    | ubiquitin-conjugating enzyme E2H                          | ENST00000355621.3 | ubiquitin-conjugating enzyme E2H                          | 855  | Sites in UTR | 3 | -0.68 | -0.79 |
| 35  | 81 | hsa-miR-1258 | ZNF100   | zinc finger protein 100                                   | ENST00000358296.6 | zinc finger protein 100                                   | 142  | Sites in UTR | 1 | -0.43 | -0.43 |

## MATERIALS AND METHODS

### Cell culture and tissue samples

Liver cancer cells (Hep3B, HuH7, HepG2, HCCLM3, Mahlavu, SNU475) were cultured in Dulbecco's modified Eagle's medium with 10% FBS and 100 units/mL of penicillin and 100 µg/mL of streptomycin (Invitrogen, Carlsbad, CA). All cell lines were maintained at 37°C in the presence of 5% CO<sub>2</sub>. The collection of tumor and adjacent normal liver tissues from HCC patients were approved by the Ethics Committee of the Yijishan Hospital of Wannan Medical College and the Affiliated Cancer Hospital of Zhengzhou University. None of the patients had received chemotherapy or radiotherapy before surgical resection. All specimens were immediately frozen in liquid nitrogen and stored at -80°C until analysis.

### qRT-PCR analysis

For mRNA detection, the total RNA was reverse transcribed using the SuperScript® VILO™ cDNA Synthesis Kit (Invitrogen, CA). The qPCR was performed using SsoFast™ EvaGreen® Supermix (Bio-Rad). For miRNA detection, the total RNA samples were polyadenylated and reverse transcribed for a two-step quantitative RT-PCR reaction using the NCode™ VILO™ miRNA cDNA Synthesis Kit and EXPRESS SYBR® GreenER™ miRNA qRT-PCR Kits (Invitrogen, CA) according to the manufacturer's instructions. The *HPRT1* or *U6* gene was used as an endogenous control, and fold changes were calculated via relative quantification (2<sup>-ΔC<sub>t</sub></sup>).

### Soft agar colony assay

The established p-miR-1258 and p-miR-control stable transfected cells or pWZL-CKS1B and pWZL-control transfected cells was mixed with tissue culture medium containing 0.6% low-melting-point agarose (Sigma Sant Louise, MO), resulting in a final agar concentration of 0.3%. Then, 500 µL of the cell suspension (800 cells) was immediately plated in 24-well plates coated with 500 µL 0.6% agar in tissue culture medium and cultured at 37°C with 5% CO<sub>2</sub>. The plates were kept in the incubator and the number of colonies formed was counted under an inverted light microscope (×40 objective) after 2–3 weeks. The assay was analyzed in duplicate in three independent experiments.

### In vitro transwell cell migration assay

Cell migration was detected using 24 well Transwell chambers without Matrigel matrix (8 µm pore size, BD Biosciences, CA, USA). In brief, 600 µl complete medium was added to the bottom chamber, stable transfected cells were suspended in serum-free medium, and 500 µl of the cell suspension (containing 5 × 10<sup>4</sup> cells) was placed in the upper chamber. After 24 hours, the cells on the top

surface of the membrane were mechanically removed using a cotton swab, and the cells on the bottom surface of the membrane were fixed in 95% ethanol and stained with a 4 g/L crystal violet solution. Cells adhering to the bottom surface of the membrane were counted in five randomly selected areas under a 40× microscope field. Each experiment was repeated three times.

### Sphere formation assay

Single stably p-miR-1258 and p-miR-control stable transfected cells or pWZL-CKS1B and pWZL-control transfected cells (1 × 10<sup>4</sup>) were plated onto a 6-well ultra-low attachment plate (Corning, Corning, NY) in serum-free DMEM-F12, supplemented with 2 mM L-glutamine, 1% sodium pyruvate (Invitrogen), 1% MEM nonessential amino acids (Invitrogen), 1% insulin-transferrin-selenium-X supplement (Invitrogen), 1 µM dexamethasone (Wako), 200 µM L-ascorbic acid 2-phosphate (Sigma-Aldrich), 10 mM nicotinamide (Wako), 100 µg/ml penicillin, and 100 U/ml streptomycin supplemented with 20 ng/ml epithelial growth factor and 10 ng/ml fibroblast growth factor-2 (Invitrogen). After 2–3 weeks of culture, the number of spheres (diameter > 40 µm) was manually counted in three randomly selected fields at the magnification of 40× using an inverted fluorescence microscope. Results were obtained from three independent experiments performed in triplicate.

### Luciferase reporter assay

For the reporter assay, HCCLM3 cells were plated onto 24-well plates and transfected with the above constructs and P-miR-1258 or P-miR-control vectors using Lipofectamine 3000 (Thermo Fisher Scientific, USA). A Renilla luciferase vector pRL-SV50 (Promega, Madison, WI) was co-transfected to normalize the difference in the transfection efficiency. After 48 h, the cells were harvested and assayed using the dual-luciferase reporter assay system (Promega, Madison, WI) according to the manufacturer's instructions. Results were obtained from three independent experiments performed in duplicate.

### Survival and statistical analysis

The experimental data are presented as the mean ± standard deviation (SD). All statistical analyses were performed using ANOVA or a two-tailed Student's *t* test by GraphPad Prism 5.0 (GraphPad Software, La Jolla, CA). The survival curves were created using the Kaplan-Meier method and statistically compared using a log-rank test. Differences were considered statistically significant when the *P*-values were less than 0.05.
